# Supplementary material for: Intimate relationship characteristics as determinants of HIV risk among men who have sex with regular male sex partners: a cross-sectional study in Guangzhou, China
Source: BMC Infect Dis. 2018 Apr 2;18:150. doi: 10.1186/s12879-018-3044-6 (PMC5879993; doi:10.1186/s12879-018-3044-6)
Supplement: Supplementary file 1 — Dataset. Intimate relationship and UAI among MSM in Guangzhou, China. (XLS 177 kb) [file 12879_2018_3044_MOESM1_ESM.xls]

## Sheet: dataset
ID	age	age2	marital	residence	residencelength	education	student	income	oritention	durationMSM	venue	UAIRP	UAINRP	CUAI	multiple	typerelationship	dominant	lengthRP	monogamous	communicationUAINRP	exchange	investment	expectation
594	36	2	2	1	2	2	1	2	2	2	2	1	1	1	0	1	0	1	1	1	0	0	1
595	24	1	2	1	2	2	1	1	2	2	2	1	1	1	0	1	0	1	1	0	0	1	1
597	23	1	2	2	2	2	1	1	2	1	2	1	1	1	1	0	0	0	0	1	0	0	1
599	26	2	2	1	2	2	1	2	2	1	2	1	1	1	0	0	0	1	0	1	0	0	0
600	34	2	2	1	2	2	1	2	2	2	2	1	1	1	0	0	1	0	0	1	0	0	1
602	39	2	1	2	2	1	1	2	2	2	2	2	1	1	1	0	0	0	0	0	0	0	1
603	33	2	2	1	2	1	1	2	2	2	2	1	1	1	0	0	0	0	1	1	0	0	1
607	22	1	2	2	2	2	2	1	2	1	2	2	1	1	1	1	1	0	1	1	0	1	0
608	22	1	2	1	2	2	2	1	2	2	2	2	2	2	1	0	1	1	0	1	0	1	0
610	21	1	2	2	2	2	1	2	2	1	2	2	1	1	0	1	0	1	0	0	0	0	0
611	31	2	1	2	2	2	1	2	2	1	2	1	1	1	0	1	0	1	1	0	0	0	1
612	35	2	2	2	2	2	1	2	2	2	2	2	2	2	1	1	0	0	1	0	0	1	1
613	35	2	1	2	2	2	1	2	2	2	2	2	1	1	0	1	0	1	1	1	0	0	1
614	32	2	2	2	2	2	1	2	2	2	1	1	1	1	0	0	0	0	1	1	0	0	1
615	33	2	2	2	2	2	1	2	2	2	1	1	1	1	1	1	0	1	0	0	0	1	1
616	25	2	2	2	2	2	1	2	2	2	2	2	1	1	1	1	0	1	1	1	0	1	1
618	31	2	2	2	2	2	1	2	2	2	2	2	2	2	0	1	1	1	1	1	0	1	1
619	38	2	2	1	2	2	1	2	2	2	2	2	2	2	1	1	0	1	1	1	1	0	1
620	31	2	2	2	2	2	1	1	1	1	2	1	1	1	0	0	0	1	0	0	0	1	1
621	25	2	2	2	2	2	1	2	2	1	2	1	1	1	0	0	0	1	0	1	0	1	1
622	28	2	2	2	2	2	1	2	2	2	2	2	2	2	0	0	0	0	0	1	0	0	1
623	25	2	2	2	2	1	1	1	2	2	2	1	1	1	1	0	1	0	0	0	0	0	0
624	23	1	2	1	2	2	2	1	2	2	2	2	1	1	0	1	0	1	0	1	0	0	1
627	26	2	2	2	2	2	2	1	1	2	1	2	1	1	0	0	0	0	1	1	0	1	0
628	42	2	2	1	2	2	1	2	2	2	1	2	2	2	0	0	0	0	0	1	0	0	1
631	26	2	2	2	2	1	1	1	2	2	2	1	1	1	1	0	0	0	1	1	0	0	1
632	18	1	2	1	1	1	1	1	2	1	2	1	1	1	0	0	0	0	0	1	0	1	1
634	26	2	2	1	2	2	1	2	2	2	2	2	2	2	1	0	0	0	0	0	0	0	1
636	42	2	1	2	2	1	1	1	2	2	2	2	2	2	0	1	0	1	0	0	0	0	1
637	18	1	2	2	2	2	2	1	2	1	1	2	1	1	0	1	1	0	1	0	0	0	1
638	22	1	2	1	1	1	1	1	1	1	1	2	1	1	0	1	0	1	1	0	0	0	1
639	23	1	2	1	2	1	1	1	1	2	1	2	2	2	1	1	0	1	0	0	0	1	0
640	27	2	2	2	2	2	1	2	2	2	2	1	1	1	0	1	0	1	0	1	0	0	1
641	30	2	2	2	2	2	1	2	2	2	2	2	1	1	0	1	0	1	0	1	0	1	1
642	24	1	2	1	2	2	1	1	1	1	2	1	1	1	0	0	1	0	0	0	0	1	1
643	32	2	2	1	2	2	1	2	1	2	2	2	2	2	1	0	0	1	0	0	0	0	1
647	28	2	2	2	2	2	1	1	2	2	2	1	1	1	0	1	0	1	0	1	0	0	1
648	19	1	2	1	1	1	1	2	2	1	2	1	1	1	1	0	1	0	0	1	0	0	1
649	28	2	2	2	2	2	1	2	2	2	2	2	1	1	0	1	0	0	1	1	0	1	1
651	22	1	2	2	2	2	2	1	2	1	2	1	1	1	0	1	0	1	1	1	0	0	1
652	35	2	1	2	2	2	1	2	1	2	2	1	1	1	0	0	0	0	0	0	0	0	0
653	26	2	2	1	1	2	1	2	2	1	2	2	1	1	0	1	1	1	1	1	0	0	1
654	41	2	1	2	2	2	1	2	2	2	1	1	1	1	1	0	1	0	0	1	0	1	1
655	37	2	2	2	2	2	1	2	2	2	1	1	1	1	0	1	0	0	1	1	0	0	1
659	27	2	2	1	1	2	1	1	2	2	2	2	2	2	1	0	0	1	0	0	0	0	1
660	26	2	2	1	2	1	1	2	2	1	2	2	2	2	1	1	0	0	1	0	0	1	1
662	22	1	2	2	1	2	2	1	2	1	2	1	1	1	0	0	1	0	0	0	0	1	1
663	28	2	2	1	2	2	1	2	2	1	2	2	2	2	0	1	0	1	0	0	0	1	1
664	32	2	1	1	1	2	1	2	2	2	2	2	1	1	0	0	0	1	1	1	0	1	1
665	34	2	2	1	2	1	1	1	2	2	2	2	1	1	0	1	0	1	1	1	0	0	1
670	19	1	2	2	2	1	1	1	2	1	2	1	1	1	0	0	1	0	0	0	0	0	0
671	33	2	2	2	2	2	1	2	2	2	2	2	2	2	0	0	0	1	0	1	0	0	1
674	27	2	2	2	2	2	1	1	1	2	2	2	2	2	0	1	0	1	0	0	0	0	1
677	28	2	2	1	2	2	1	2	1	1	2	2	2	2	1	1	0	1	0	1	0	0	1
678	37	2	2	2	2	2	1	2	2	2	2	1	1	1	0	0	0	1	0	0	0	0	1
679	28	2	2	1	2	2	1	2	2	2	2	2	1	1	0	1	0	0	1	1	0	0	1
680	35	2	1	1	2	2	1	2	1	1	2	1	1	1	0	0	1	0	0	1	0	0	0
681	24	1	2	2	1	2	1	2	2	1	2	2	1	1	1	1	1	1	0	1	0	0	1
682	37	2	2	2	2	2	1	2	2	2	2	2	2	2	0	1	0	1	0	1	0	0	1
684	29	2	2	2	2	1	1	1	2	1	2	1	1	1	0	1	0	1	0	1	0	1	1
685	23	1	2	1	2	1	1	2	2	2	2	2	2	2	0	1	0	0	1	1	1	0	0
686	31	2	2	2	2	1	1	1	2	2	2	1	1	1	0	1	0	1	1	1	0	0	1
689	22	1	2	1	2	2	2	1	2	1	2	2	1	1	0	1	0	1	1	0	0	0	1
690	23	1	2	2	2	2	2	1	2	1	2	2	1	1	0	1	1	0	0	0	0	1	1
692	34	2	2	1	1	1	1	2	1	2	2	2	2	2	0	1	0	0	1	1	0	0	1
693	28	2	2	1	2	2	1	2	1	1	2	1	1	1	1	0	0	1	0	0	0	1	1
695	27	2	2	1	1	2	1	2	2	2	2	1	1	1	0	1	0	0	1	1	0	0	1
696	23	1	2	2	2	2	1	2	2	1	2	1	2	1	0	1	0	1	0	0	0	1	1
697	23	1	2	1	2	2	2	1	2	2	2	1	1	1	1	1	1	0	1	0	0	0	1
698	36	2	1	1	2	2	1	2	2	1	2	2	1	1	0	1	0	1	1	1	0	0	1
701	19	1	2	1	1	2	2	1	1	1	1	2	1	1	1	1	0	0	1	1	0	0	0
702	25	2	2	1	2	1	1	1	2	1	2	2	2	2	0	0	0	1	1	1	0	0	0
704	19	1	2	1	2	1	2	1	2	1	2	2	2	2	1	0	0	0	1	1	0	0	1
705	26	2	2	1	1	2	1	2	2	2	2	2	1	1	0	0	0	0	1	0	0	1	0
706	24	1	2	1	2	2	2	1	2	1	2	1	1	1	0	1	1	0	0	1	0	1	0
709	20	1	2	2	1	2	2	1	1	1	2	2	2	2	0	1	0	0	1	0	0	0	1
710	24	1	2	1	2	2	1	2	2	2	2	1	1	1	0	0	0	0	0	0	0	0	1
711	25	2	2	1	2	1	1	1	2	2	2	1	1	1	0	0	0	0	0	1	0	0	1
712	23	1	2	1	2	2	1	2	2	1	2	2	1	1	1	0	0	0	0	1	0	1	1
714	27	2	2	1	2	2	1	2	2	2	2	2	1	1	0	1	0	0	1	0	0	0	1
715	29	2	2	1	2	2	1	2	2	2	2	1	1	1	0	0	0	0	1	0	0	0	1
717	24	1	2	1	1	2	2	1	2	1	2	2	1	1	0	0	1	0	0	1	0	0	1
719	27	2	2	2	2	2	1	2	1	2	2	2	1	1	0	0	0	1	0	1	0	1	0
720	24	1	2	1	1	2	1	1	1	1	2	1	1	1	0	0	0	0	1	1	0	1	0
721	22	1	2	1	1	2	2	1	2	1	2	1	1	1	0	1	0	0	0	1	0	0	1
722	23	1	2	1	2	2	2	1	2	1	2	1	1	1	0	1	0	0	1	0	0	1	1
723	22	1	2	1	2	2	2	1	1	1	1	1	1	1	0	1	1	0	1	1	0	1	1
724	34	2	2	1	2	2	1	2	2	2	2	2	1	1	0	0	0	0	0	0	0	0	1
725	26	2	2	2	2	1	1	2	1	1	2	2	2	2	0	0	0	0	0	0	1	1	1
726	19	1	2	1	1	1	1	2	1	1	2	2	1	1	0	1	0	1	1	1	0	0	1
727	23	1	2	1	2	1	1	2	2	1	1	2	1	1	1	1	0	1	1	1	0	0	1
728	39	2	1	1	2	2	1	1	1	2	1	2	1	1	0	1	0	1	1	1	0	1	1
729	35	2	1	2	1	2	1	1	2	2	2	2	1	1	0	1	1	1	1	1	0	1	1
732	27	2	2	2	2	2	1	2	1	2	2	2	1	1	1	0	0	0	1	1	0	0	1
735	29	2	2	1	1	2	1	1	2	1	2	2	2	2	0	0	0	0	0	1	0	0	1
736	32	2	1	1	1	2	1	2	1	2	2	2	1	1	0	0	0	1	1	1	0	1	1
738	42	2	1	1	2	1	1	1	2	2	2	1	1	1	0	0	0	0	0	0	0	1	1
739	23	1	2	2	2	2	1	2	2	2	2	1	1	1	1	0	0	0	0	1	0	1	0
741	23	1	2	2	2	2	2	1	2	2	2	1	1	1	0	1	0	1	0	1	0	0	1
746	25	2	2	1	2	2	1	2	2	2	2	2	1	1	0	1	0	1	0	1	0	0	1
747	23	1	2	1	1	2	1	2	2	1	2	2	2	2	0	1	0	0	1	1	0	0	1
748	32	2	2	1	2	1	1	1	2	2	2	2	1	1	0	1	1	0	0	0	0	0	1
749	22	1	2	2	2	2	2	2	2	1	2	1	2	1	1	1	0	1	0	1	0	1	1
806	42	2	2	2	2	2	1	2	2	2	2	2	1	1	0	0	0	0	0	0	0	0	1
807	30	2	1	1	2	2	1	2	1	2	2	2	1	1	0	0	0	1	0	0	0	0	1
808	37	2	2	1	2	2	1	2	2	2	2	1	1	1	0	0	0	0	1	1	0	1	1
811	31	2	2	2	2	2	1	2	2	2	1	1	1	1	0	1	1	1	0	0	0	0	1
812	29	2	2	2	2	2	1	2	2	2	2	1	1	1	1	0	1	1	0	0	0	0	1
813	34	2	2	1	2	2	1	2	2	2	2	1	1	1	1	1	1	1	0	0	0	0	1
815	25	2	2	1	2	2	1	2	2	2	2	2	1	1	0	1	0	1	1	1	0	0	1
818	27	2	2	2	2	2	1	1	2	2	2	1	1	1	0	1	1	0	0	0	0	0	1
820	26	2	2	1	1	2	1	2	2	2	1	2	1	1	1	1	0	1	0	1	0	0	1
822	27	2	2	2	2	2	1	1	1	1	2	1	1	1	0	0	0	0	1	1	0	0	1
824	35	2	1	2	2	2	1	2	1	2	2	2	1	1	0	1	0	1	0	0	0	0	1
825	30	2	2	1	1	2	1	2	1	2	2	2	2	2	1	0	0	1	1	1	0	0	0
826	24	1	2	1	2	2	1	1	2	2	2	2	2	2	0	1	1	0	1	0	0	1	1
827	38	2	2	2	2	1	1	1	2	2	2	1	1	1	1	0	1	1	0	0	0	0	1
828	36	2	1	1	2	2	1	2	2	2	2	2	1	1	0	0	0	0	0	0	0	1	1
829	19	1	2	1	1	2	2	1	2	1	2	2	2	2	0	0	0	0	0	0	0	0	0
830	22	1	2	1	2	2	2	1	2	1	2	1	2	1	0	1	0	0	1	0	0	0	1
831	21	1	2	2	2	2	2	2	2	1	2	1	1	1	0	0	0	0	0	0	0	0	1
832	32	2	2	1	2	2	1	2	2	2	2	2	1	1	0	1	0	0	1	0	0	0	1
834	23	1	2	2	2	1	1	1	2	2	2	1	1	1	0	1	0	1	1	0	0	0	1
838	23	1	2	1	1	2	1	1	2	1	2	2	1	1	0	1	1	1	0	0	0	0	1
839	22	1	2	1	1	2	2	1	2	2	2	2	1	1	0	0	0	0	0	1	0	0	1
840	23	1	2	1	2	2	2	1	2	1	2	1	1	1	0	0	1	0	0	1	0	0	1
841	23	1	2	1	2	2	1	1	1	1	2	1	1	1	1	0	0	0	0	1	0	0	0
842	26	2	1	1	2	1	1	2	2	1	2	2	1	1	0	1	0	0	0	0	0	0	1
843	29	2	2	1	2	1	1	2	1	2	2	2	2	2	0	1	0	1	0	0	0	1	1
848	33	2	2	1	2	2	1	2	2	1	2	2	1	1	1	0	0	0	1	1	0	0	1
849	20	1	2	1	1	1	1	1	2	1	2	1	1	1	0	0	0	0	0	0	0	0	0
850	38	2	1	2	1	1	1	1	1	2	2	2	1	1	0	1	0	1	0	0	0	1	0
851	25	2	2	1	1	2	1	2	1	1	1	2	2	2	1	0	1	0	0	0	0	0	1
852	24	1	2	2	2	2	2	1	2	1	2	1	1	1	0	0	0	1	0	0	0	0	1
858	23	1	2	1	2	2	2	1	1	1	2	2	2	2	0	1	0	0	0	1	0	0	1
860	34	2	1	1	2	1	1	1	1	1	2	1	1	1	0	0	1	0	0	1	0	0	1
861	34	2	2	2	2	2	1	2	2	2	2	1	1	1	1	0	0	1	0	1	0	0	1
862	30	2	2	2	2	2	1	2	1	2	2	1	1	1	1	0	0	0	0	1	0	0	1
863	21	1	2	1	1	2	2	1	2	2	2	1	1	1	0	0	0	0	0	1	0	0	0
864	31	2	2	1	2	1	1	1	2	2	1	2	1	1	1	1	0	1	0	1	0	0	1
865	17	1	2	1	2	1	1	1	1	1	2	2	1	1	1	1	1	0	0	1	0	1	1
866	24	1	2	1	2	2	1	2	2	2	2	1	1	1	0	1	0	1	0	0	0	0	0
867	26	2	1	1	1	1	1	1	2	1	2	1	1	1	0	1	0	1	0	1	0	1	1
868	27	2	2	1	2	2	1	2	2	2	2	2	2	2	0	1	0	1	1	1	0	1	1
869	27	2	2	1	2	2	1	2	2	2	2	2	1	1	0	1	0	1	0	1	0	1	1
870	28	2	2	2	2	2	1	2	2	2	2	2	2	2	0	1	0	1	0	0	0	0	1
874	32	2	2	2	2	2	1	2	1	1	2	1	1	1	0	1	0	0	1	0	0	0	0
876	28	2	2	1	2	1	1	1	2	2	2	1	1	1	0	1	0	1	1	1	0	0	1
879	26	2	2	1	1	1	1	1	2	1	2	2	1	1	0	0	0	0	0	0	0	0	1
883	23	1	2	1	2	1	1	1	2	1	2	1	1	1	0	0	0	1	0	0	0	1	1
884	22	1	1	1	2	1	1	1	1	1	2	1	1	1	0	1	1	0	1	0	0	0	0
885	22	1	2	1	2	2	2	1	2	1	2	1	1	1	0	0	0	0	1	0	0	1	0
887	42	2	1	2	1	1	1	1	1	1	2	2	1	1	0	1	0	1	0	1	0	0	0
888	24	1	2	2	1	2	1	1	1	1	2	2	1	1	1	0	1	0	0	0	0	0	0
889	35	2	1	2	2	2	1	2	1	1	2	1	1	1	0	0	0	0	0	0	0	0	0
891	22	1	2	2	2	2	2	1	1	1	2	1	1	1	0	0	0	1	0	1	0	0	1
892	21	1	2	1	1	2	2	1	2	1	2	2	2	2	1	1	1	1	0	0	0	1	1
893	22	1	2	1	1	1	1	1	2	1	2	2	1	1	1	0	0	0	0	0	0	0	0
895	34	2	1	1	2	2	1	2	2	1	2	1	1	1	0	0	0	1	1	1	0	0	1
896	25	2	2	1	2	2	1	1	2	2	2	2	2	2	1	0	1	0	0	1	1	1	1
898	41	2	1	2	2	2	1	2	1	2	2	2	2	2	0	0	0	1	1	0	0	0	1
899	30	2	2	2	2	2	1	1	2	1	2	1	1	1	0	0	0	0	0	1	0	1	0
900	31	2	2	2	2	2	1	2	2	2	2	1	1	1	0	1	0	1	0	1	0	0	1
902	26	2	2	1	2	2	1	1	1	2	2	2	2	2	0	0	0	0	0	0	0	0	0
903	20	1	2	1	1	2	2	1	2	1	2	2	1	1	1	1	1	0	1	0	0	0	0
904	25	2	2	1	2	2	1	2	1	2	2	1	1	1	1	0	0	0	0	0	0	0	1
906	25	2	2	2	2	2	1	2	2	2	2	2	1	1	1	0	1	1	0	1	0	0	1
907	23	1	2	1	1	2	2	1	2	1	2	1	2	1	0	0	1	1	0	0	0	1	1
909	24	1	2	1	2	2	1	2	2	1	2	1	1	1	1	0	0	0	0	1	0	0	0
910	44	2	2	1	1	2	1	2	2	2	2	1	1	1	0	0	0	1	0	0	0	0	1
911	24	1	1	1	2	2	1	2	2	1	2	1	2	1	0	0	1	1	0	0	0	1	1
912	32	2	2	1	2	2	1	2	2	2	2	1	1	1	0	1	0	0	1	1	0	1	1
913	23	1	2	1	1	2	2	1	2	1	2	2	1	1	1	0	0	0	0	0	0	0	1
914	24	1	2	1	1	1	1	1	2	1	2	1	1	1	0	1	0	1	0	0	0	1	1
915	19	1	2	2	2	2	2	1	2	1	2	2	1	1	0	1	1	0	1	1	0	1	1
916	26	2	2	2	2	2	1	1	2	1	2	1	2	1	1	0	1	0	0	0	0	0	1
917	23	1	2	2	2	2	2	1	1	1	1	2	1	1	0	0	0	0	0	1	0	0	1
918	23	1	2	2	2	2	2	1	2	2	2	2	1	1	1	0	0	0	0	0	0	0	1
937	28	2	2	2	2	2	1	2	2	1	2	1	1	1	0	1	1	1	0	1	0	0	1
938	28	2	2	1	2	1	1	2	1	1	2	2	2	2	1	0	0	0	0	0	0	1	0
939	32	2	2	2	2	2	1	2	2	2	2	2	1	1	1	0	0	1	0	0	0	0	1
940	18	1	2	2	2	2	2	1	2	1	2	1	2	1	0	1	1	0	1	1	0	0	1
941	36	2	2	2	2	2	1	2	2	2	2	1	1	1	0	1	0	1	1	1	0	1	1
945	33	2	2	2	2	2	1	2	2	2	2	1	1	1	0	1	0	1	0	0	0	0	1
946	32	2	1	2	2	2	1	2	2	2	2	1	1	1	0	1	0	0	1	1	0	1	1
948	22	1	2	2	2	2	2	1	2	1	2	2	1	1	0	1	0	0	0	0	0	1	1
949	23	1	2	2	2	2	1	1	2	2	2	1	1	1	1	1	0	1	0	1	0	0	1
950	38	2	2	1	2	2	1	2	2	2	2	1	1	1	1	0	1	0	0	0	0	0	1
951	29	2	2	2	2	2	1	2	2	2	2	2	2	2	1	0	0	0	1	1	0	0	0
953	21	1	2	2	2	1	1	1	1	1	1	1	1	1	0	1	1	0	1	1	0	1	1
954	27	2	2	1	2	1	1	1	2	1	2	1	1	1	1	0	0	0	1	1	0	0	0
955	20	1	2	1	2	1	1	1	2	1	2	2	2	2	1	0	1	0	1	0	0	1	1
956	23	1	2	1	2	1	1	2	2	1	2	1	1	1	0	0	0	1	0	1	0	0	1
957	39	2	2	1	2	2	1	2	2	2	2	1	1	1	1	0	1	1	0	0	0	1	1
959	28	2	1	1	2	1	1	1	1	2	2	1	1	1	0	0	0	0	0	1	0	1	1
960	24	1	2	1	2	2	1	2	2	2	2	2	1	1	0	1	0	0	1	1	0	0	1
961	24	1	2	2	2	2	1	1	2	1	2	1	1	1	0	1	0	0	1	0	0	0	1
962	22	1	2	1	1	2	1	1	2	1	2	2	1	1	1	0	1	0	0	0	0	1	1
963	26	2	2	1	2	2	1	2	1	2	2	1	1	1	0	1	0	1	0	1	0	1	1
965	42	2	1	1	1	2	1	2	2	2	2	1	1	1	0	0	0	0	0	0	0	0	1
966	39	2	2	2	2	2	1	2	1	2	1	2	1	1	1	1	0	1	1	1	0	0	1
967	26	2	2	1	1	2	1	1	2	2	2	2	1	1	0	1	1	0	1	0	0	0	1
968	41	2	1	1	2	2	1	2	2	2	2	1	1	1	0	0	0	0	0	0	0	0	1
970	27	2	2	1	2	2	1	2	2	1	2	1	1	1	0	0	1	0	0	1	0	0	0
971	22	1	2	2	2	2	1	2	2	1	2	2	1	1	0	1	0	1	1	1	0	0	1
973	21	1	2	2	2	2	2	1	2	1	2	2	1	1	0	1	1	0	1	1	0	1	1
974	20	1	2	1	1	2	2	1	2	1	1	2	1	1	0	1	1	0	1	0	0	1	1
976	27	2	2	1	2	1	1	2	1	2	2	2	1	1	0	1	0	0	0	1	0	0	1
977	29	2	1	1	1	2	1	1	2	2	2	2	2	2	0	1	0	1	0	1	0	1	1
979	27	2	2	2	2	2	1	1	2	2	2	1	1	1	0	0	0	0	0	0	0	0	1
982	27	2	2	1	2	2	1	2	1	2	2	2	2	2	0	1	0	1	1	0	0	0	0
983	20	1	2	1	2	2	2	1	2	1	1	2	1	1	0	1	0	1	1	0	0	0	0
987	23	1	2	1	2	1	1	1	1	1	2	2	2	2	1	0	0	0	0	0	0	0	0
988	49	2	1	1	2	2	1	2	2	2	1	2	1	1	0	1	0	1	1	1	0	0	1
994	29	2	2	1	2	2	1	2	2	2	2	1	1	1	0	0	0	1	0	0	0	1	1
996	23	1	2	2	2	2	1	2	2	2	2	1	1	1	0	1	0	1	1	1	0	1	1
998	25	2	2	1	2	2	1	2	1	1	2	1	1	1	1	1	0	0	1	0	0	1	1
999	25	2	2	1	2	2	1	2	2	1	2	2	1	1	0	1	0	0	1	0	0	1	1
1002	23	1	2	2	2	2	2	1	2	1	2	2	1	1	1	1	1	0	1	0	0	0	1
1004	39	2	2	1	1	2	1	1	2	2	2	1	1	1	1	1	1	1	0	0	0	0	1
1005	25	2	2	1	2	2	1	1	2	2	2	1	1	1	0	0	0	0	0	0	0	0	1
1006	28	2	2	2	1	2	1	2	2	2	1	1	1	1	1	1	1	1	1	1	0	1	1
1007	24	1	2	2	2	2	1	1	2	1	2	1	1	1	0	1	0	1	0	0	0	1	1
1008	29	2	2	1	2	2	1	2	2	2	2	1	1	1	1	0	1	0	0	0	0	0	1
1009	20	1	2	1	1	2	2	1	2	1	2	2	2	2	0	1	0	1	1	1	0	0	0
1010	29	2	2	1	2	2	1	2	2	2	2	1	1	1	0	1	0	0	0	0	0	0	1
1014	24	1	2	1	2	2	1	1	1	2	2	2	2	2	0	0	1	0	0	0	0	0	1
1016	32	2	2	1	2	2	1	2	2	2	2	2	2	2	0	1	0	1	0	1	0	0	1
1017	33	2	1	1	2	1	1	1	1	1	2	1	1	1	1	0	0	0	0	0	0	0	0
1018	31	2	2	1	2	2	1	2	2	2	2	2	2	2	1	1	1	1	0	0	0	0	1
1020	24	1	2	2	2	2	1	2	1	1	2	1	1	1	0	0	0	0	1	0	0	0	0
1022	39	2	1	1	2	2	1	2	2	1	1	2	2	2	0	1	0	1	0	1	0	1	1
1023	40	2	1	1	2	1	1	2	2	2	1	2	2	2	1	0	0	0	0	0	0	0	1
1024	20	1	2	2	2	2	2	1	2	1	2	2	1	1	0	1	0	1	1	1	0	0	1
1025	19	1	2	2	2	2	2	1	2	1	2	2	1	1	1	1	0	1	1	1	0	0	1
1029	24	1	2	2	2	2	1	2	2	1	2	1	1	1	0	1	0	0	1	0	0	0	1
1030	31	2	2	1	2	1	1	2	2	2	2	2	1	1	0	1	0	1	0	0	0	0	1
1031	32	2	1	1	2	2	1	2	1	2	2	2	2	2	1	0	0	0	1	1	0	0	1
1033	25	2	2	1	2	2	1	2	2	2	1	1	1	1	0	1	1	0	1	1	0	0	1
1034	34	2	2	2	2	2	1	2	2	2	2	1	1	1	1	0	0	0	0	1	0	1	0
1035	38	2	2	1	2	2	1	2	2	2	2	1	1	1	0	1	1	1	0	1	0	1	1
1036	24	1	2	1	2	2	1	2	1	2	2	1	1	1	0	0	0	0	1	0	0	0	1
1039	27	2	2	1	2	1	1	2	1	1	2	1	1	1	1	0	0	1	0	0	0	0	0
1040	25	2	2	1	2	2	2	1	2	2	2	2	2	2	0	1	0	1	0	1	0	0	1
1041	35	2	1	1	1	2	1	2	2	2	2	2	2	2	1	0	0	0	0	0	0	1	1
1042	34	2	1	1	1	2	1	1	1	1	2	2	1	1	0	1	0	1	1	1	0	0	1
1043	29	2	2	2	2	2	1	2	2	2	2	1	1	1	0	0	0	0	0	1	0	0	1
1047	22	1	2	2	2	2	2	2	2	1	2	1	2	1	0	0	0	0	0	1	0	0	1
1048	31	2	2	2	2	2	1	2	2	2	2	2	1	1	1	0	0	1	1	1	0	0	1
1049	23	1	2	2	2	2	2	1	2	1	1	1	1	1	1	1	0	0	1	1	0	0	1
1050	20	1	2	1	2	2	2	1	2	1	1	2	1	1	1	1	0	0	1	1	0	0	1
1051	32	2	2	1	2	2	1	2	2	2	2	1	1	1	0	1	0	1	0	0	0	1	1
1052	21	1	2	1	1	1	1	2	2	1	2	2	2	2	1	1	0	0	0	1	0	1	1
1053	26	2	2	1	2	2	1	1	2	1	2	2	1	1	0	1	1	1	1	0	0	0	1
1057	23	1	2	1	1	2	2	1	2	1	2	1	1	1	0	1	1	1	1	1	0	0	0
1058	26	2	2	2	2	2	1	2	2	1	2	1	1	1	1	0	0	0	0	1	0	0	1
1059	24	1	2	1	1	2	1	1	2	2	2	2	1	1	1	0	0	0	1	1	0	0	1
1060	22	1	2	1	2	2	1	2	1	1	2	2	1	1	0	1	0	0	0	0	0	1	1
1061	30	2	2	2	1	1	1	1	2	2	2	2	1	1	0	0	0	1	0	0	0	0	1
1062	24	1	2	1	2	1	1	1	2	2	2	1	1	1	0	1	1	0	0	1	0	1	1
1064	24	1	2	2	2	2	1	1	2	1	2	2	1	1	0	1	0	1	0	1	0	0	1
1065	35	2	1	1	2	1	1	1	1	2	2	1	1	1	1	0	1	1	0	0	0	0	0
1066	36	2	2	2	2	2	1	2	1	2	2	1	1	1	0	1	0	1	1	1	0	1	1
1067	21	1	2	1	1	1	1	1	2	2	2	2	1	1	0	1	0	1	1	0	0	0	1
1068	22	1	2	1	2	2	2	1	2	1	1	1	1	1	0	0	0	0	0	0	0	0	0
1073	25	2	2	1	2	2	1	2	2	2	2	1	1	1	1	0	0	0	0	0	0	0	0
1075	19	1	2	1	1	2	2	1	2	1	2	1	1	1	1	0	0	0	1	1	0	1	0
1076	20	1	2	1	1	1	1	1	1	1	2	2	2	2	1	1	0	0	1	0	0	1	1
1078	17	1	2	1	2	2	2	1	2	1	2	1	2	1	1	1	1	0	0	1	0	1	1
1082	23	1	2	1	1	2	1	1	2	1	2	1	1	1	0	1	0	1	0	1	0	1	1
1083	23	1	2	1	2	1	1	1	2	1	2	2	2	2	1	0	0	1	0	1	0	1	0
1084	37	2	2	1	2	1	1	2	2	1	2	2	1	1	0	0	0	1	1	1	0	0	1
1085	27	2	2	1	2	2	1	2	2	2	2	1	1	1	0	0	0	0	0	1	0	0	1
1088	54	2	1	2	2	2	1	2	1	2	1	1	1	1	0	1	0	1	0	0	0	0	1
1090	54	2	1	1	2	1	1	1	2	1	1	2	1	1	0	0	0	1	0	0	0	0	1
1092	26	2	2	2	2	2	1	2	1	2	1	2	2	2	1	1	1	1	1	0	0	1	1
1093	34	2	2	2	2	2	1	1	2	2	2	1	2	1	1	0	0	0	0	1	0	1	0
1097	26	2	2	1	2	2	1	1	2	1	2	2	1	1	0	0	0	0	0	1	0	1	1
1098	26	2	2	1	2	1	1	2	2	1	2	2	1	1	0	1	1	0	1	1	0	0	1
1100	25	2	2	1	1	2	1	1	1	1	2	2	1	1	1	1	0	0	1	1	0	0	0
1101	25	2	2	2	2	2	1	1	2	1	2	2	2	2	0	0	0	0	0	0	0	0	0
1102	42	2	2	2	2	2	1	2	2	2	2	1	1	1	0	1	0	1	1	1	0	1	1
1103	35	2	2	1	2	2	1	2	2	2	2	2	1	1	1	1	0	0	0	0	0	1	1
1104	25	2	2	1	2	2	1	2	2	1	2	1	1	1	1	0	1	0	0	0	0	0	0
1105	21	1	2	1	2	2	2	1	2	1	2	2	1	1	0	1	0	0	1	1	0	0	1
1107	24	1	2	1	2	2	1	1	2	2	2	1	1	1	1	1	0	0	0	0	1	1	1
1108	25	2	2	2	2	2	1	2	2	1	2	1	1	1	0	1	0	1	0	1	0	0	1
1111	34	2	1	1	2	1	1	2	1	1	2	1	1	1	1	0	0	0	0	0	0	0	1
1113	22	1	2	1	1	2	1	2	2	1	2	2	1	1	0	1	1	0	0	1	0	1	1
1114	27	2	2	1	1	2	1	2	2	2	2	1	1	1	0	1	0	1	0	1	0	1	1
1115	35	2	2	2	2	2	1	2	2	2	2	1	1	1	1	0	0	0	0	1	0	0	1
1116	22	1	2	1	2	1	1	1	1	1	2	2	2	2	0	0	0	0	0	0	0	0	0
1117	28	2	2	2	2	2	1	2	2	2	2	1	1	1	0	1	1	1	0	1	0	0	1
1119	30	2	2	2	2	2	1	2	2	2	2	2	2	2	1	1	0	1	0	0	0	0	1
1121	23	1	2	1	2	1	1	2	2	1	2	2	1	1	0	0	0	0	1	0	0	0	1
1122	26	2	2	1	1	2	1	1	1	1	2	1	1	1	1	1	0	0	0	0	0	1	0
1123	29	2	2	1	2	2	1	2	2	2	2	1	1	1	0	0	0	0	0	0	0	0	0
1125	30	2	2	2	2	2	1	2	2	2	1	2	1	1	0	1	0	1	1	1	0	1	1
1126	24	1	2	2	2	2	1	1	2	1	2	1	1	1	0	1	0	1	1	0	0	0	1
1129	31	2	2	2	2	2	1	2	2	1	2	1	1	1	0	1	0	0	1	0	0	0	1
1130	35	2	1	1	2	1	1	1	2	2	2	1	1	1	0	0	0	0	0	1	0	0	0
1131	28	2	2	2	2	2	1	2	2	2	2	2	1	1	1	0	0	1	0	1	0	0	1
1132	34	2	1	1	2	2	1	2	2	2	2	2	1	1	1	0	0	1	0	0	0	1	1
1134	23	1	2	1	1	2	1	1	2	2	2	2	2	2	0	0	1	0	1	1	0	1	1
1135	35	2	2	2	2	2	1	2	1	2	2	2	2	2	0	0	1	0	1	1	0	1	0
1139	35	2	1	1	2	2	1	2	2	2	2	2	1	1	1	1	0	0	0	0	1	1	1
1140	35	2	1	1	2	2	1	2	2	2	2	2	1	1	0	1	0	1	1	0	0	1	1
1141	27	2	2	1	2	2	1	2	2	2	2	1	1	1	0	0	0	0	0	0	0	1	1
1142	24	1	2	1	2	1	1	1	2	2	2	1	2	1	0	1	1	0	0	0	0	0	0
1147	40	2	1	1	2	1	1	1	1	2	1	2	2	2	1	0	0	1	0	0	0	0	1
1148	35	2	2	2	2	2	1	2	2	2	2	1	1	1	0	1	0	1	0	0	0	1	1
1149	41	2	2	2	2	2	1	2	1	2	2	2	1	1	0	0	0	1	0	0	0	0	0
1151	23	1	2	1	2	2	1	2	2	2	2	2	2	2	0	1	0	1	1	0	0	0	1
1152	40	2	2	1	1	1	1	1	2	2	2	2	2	2	1	0	0	0	0	0	1	0	0
1158	35	2	2	2	1	2	1	2	1	2	2	2	2	2	0	0	0	0	1	1	0	0	1
1160	38	2	1	2	2	2	1	2	1	2	2	1	2	1	0	0	0	0	0	0	0	0	1
1162	26	2	2	2	2	2	1	1	1	1	2	1	1	1	0	1	0	1	1	1	0	0	0
1163	19	1	2	1	2	2	2	1	2	1	1	2	1	1	1	0	1	0	0	1	0	0	1
1164	33	2	2	1	2	2	1	2	2	2	1	2	1	1	0	1	0	1	0	1	0	1	1
1165	24	1	2	2	2	2	1	2	2	2	2	1	1	1	1	0	0	0	0	1	0	0	1
1166	31	2	2	1	2	1	1	1	2	1	2	2	2	2	1	0	0	0	0	1	0	0	0
1167	23	1	2	2	2	2	1	1	2	1	2	1	1	1	0	1	0	0	1	1	0	0	1
1168	23	1	2	1	2	1	1	1	2	2	2	2	2	2	1	1	0	1	1	0	0	0	1
1169	29	2	2	2	2	2	1	2	2	2	2	2	1	1	1	1	0	1	0	1	0	1	1
1171	24	1	2	1	2	2	2	1	2	1	2	2	1	1	1	1	0	0	1	1	0	1	1
1172	56	2	1	2	2	1	1	1	2	2	1	1	1	1	0	0	0	1	1	1	1	0	1
1174	25	2	2	2	1	2	1	2	2	1	2	1	1	1	1	0	0	0	0	1	0	1	1
1175	41	2	2	2	2	1	1	1	2	2	1	2	2	2	1	0	1	0	0	1	0	1	0
1176	21	1	2	2	2	2	2	1	1	1	2	1	1	1	1	0	1	1	1	1	0	0	1
1177	28	2	2	1	1	2	1	2	2	2	2	1	1	1	0	1	0	0	1	1	0	0	1
1178	31	2	2	1	2	2	1	2	2	2	2	1	1	1	0	1	0	1	0	1	0	0	1
1179	21	1	1	1	1	1	1	1	2	1	2	2	2	2	0	0	0	0	0	0	0	0	0
1181	24	1	2	1	1	2	2	1	2	1	2	1	1	1	0	0	0	0	0	0	0	0	0
1182	40	2	1	2	2	1	1	2	2	2	2	2	2	2	0	1	0	1	0	0	0	1	1
1184	50	2	2	2	2	2	1	2	2	2	2	1	1	1	1	0	0	1	0	0	0	0	1
1185	38	2	1	2	2	1	1	2	1	2	2	1	1	1	0	1	0	1	0	0	0	0	1
1186	42	2	1	1	2	1	1	1	2	2	2	2	1	1	0	1	0	0	1	1	0	0	1
1187	23	1	2	1	2	2	1	1	2	1	2	2	2	2	0	0	0	0	0	0	0	0	1
1190	27	2	2	2	2	1	1	1	2	2	2	1	1	1	1	0	0	0	0	0	0	0	0
1191	19	1	2	2	2	1	1	1	2	2	2	2	1	1	0	0	0	0	0	0	0	0	0
1194	36	2	2	2	2	2	1	2	2	2	2	1	1	1	0	1	0	1	0	1	0	0	1
1196	28	2	2	1	1	2	1	1	2	2	2	1	1	1	0	1	0	1	0	0	0	0	1
1197	39	2	1	2	2	2	1	2	1	2	2	2	1	1	1	0	0	1	0	0	0	1	1
1198	24	1	2	1	2	2	1	1	2	1	2	1	1	1	0	0	0	0	0	0	0	0	1
1199	34	2	1	1	2	2	1	2	1	2	1	2	1	1	1	1	0	1	1	1	0	0	1
1200	37	2	1	1	2	1	1	2	1	2	1	2	1	1	1	1	0	1	0	1	0	1	1
1201	23	1	2	1	1	2	1	2	2	1	1	2	1	1	0	1	1	0	0	0	0	0	1
1202	26	2	2	2	2	2	1	2	2	1	2	1	1	1	0	1	0	0	1	1	0	1	1
1203	22	1	2	1	1	2	1	1	1	1	2	2	1	1	0	1	1	1	1	0	0	0	1
1204	28	2	2	1	2	2	1	2	1	1	2	2	2	2	1	1	0	1	1	0	0	0	0
1205	22	1	2	1	2	2	2	2	2	2	2	1	1	1	0	1	1	1	0	0	0	0	1
1206	36	2	1	2	2	2	1	2	2	2	2	2	1	1	1	0	0	1	0	1	0	1	1
1208	24	1	2	1	2	2	1	1	2	2	2	1	1	1	0	1	1	0	0	1	0	1	1
1209	26	2	2	2	2	2	1	1	2	1	2	2	1	1	0	1	1	0	0	1	0	1	1
1210	25	2	2	1	2	1	1	2	2	1	2	1	1	1	0	0	0	0	0	0	0	0	0
1211	22	1	2	2	2	2	2	1	2	2	2	2	1	1	1	1	0	0	1	0	0	0	1
1212	31	2	2	2	2	2	1	2	2	2	1	2	2	2	1	1	1	1	0	1	0	1	0
1213	29	2	2	1	2	1	1	2	1	2	2	1	1	1	0	0	0	1	0	1	0	0	1
1214	55	2	1	2	2	1	1	1	2	2	2	2	1	1	0	1	0	1	1	0	0	0	1
1215	21	1	2	2	1	2	2	1	2	1	2	2	1	1	0	1	1	1	1	1	0	1	1
1221	36	2	1	1	2	1	1	1	1	1	2	2	1	1	0	1	0	1	1	1	0	0	1
1222	23	1	2	2	2	2	2	1	2	1	2	1	1	1	0	1	0	1	1	1	0	0	1
1223	32	2	2	2	2	2	1	2	2	2	2	1	1	1	0	0	1	0	0	0	0	1	1
1224	23	1	2	2	2	2	1	1	1	1	1	2	2	2	1	0	0	0	0	0	0	0	0
1225	22	1	2	1	1	2	2	1	2	1	2	1	1	1	0	1	1	0	0	1	0	1	1
1226	29	2	2	2	2	2	2	1	2	2	2	1	1	1	1	1	0	1	1	1	0	1	0
1228	28	2	2	1	2	1	1	1	2	2	2	2	1	1	0	1	0	1	0	1	0	0	1
1229	32	2	2	2	2	1	1	1	2	2	2	2	1	1	0	1	0	1	0	0	0	0	1
1231	24	1	2	2	2	2	1	2	2	1	2	2	1	1	1	1	0	1	1	1	0	1	1
1232	25	2	2	1	2	1	1	1	1	1	1	1	1	1	1	1	0	0	0	1	0	0	1
1233	19	1	2	2	2	2	2	1	2	1	1	1	1	1	1	1	1	0	1	1	0	1	1
1238	31	2	2	2	2	2	1	2	2	2	2	2	2	2	0	1	0	1	1	1	0	0	1
1239	35	2	1	2	2	2	1	2	1	2	2	2	1	1	0	1	0	1	0	1	0	0	1
1240	27	2	2	1	2	2	1	2	2	1	2	1	1	1	1	1	0	1	1	1	0	1	1
1241	41	2	1	1	1	2	1	1	2	2	2	1	1	1	0	1	0	1	1	0	0	0	1
1242	22	1	2	1	1	1	1	1	2	2	2	1	1	1	1	1	1	0	0	0	0	1	1
1244	30	2	2	1	2	2	1	2	2	1	2	2	1	1	0	1	0	1	1	0	0	0	1
1245	30	2	2	1	2	1	1	2	2	2	2	1	1	1	0	0	0	0	0	0	0	0	1
1246	20	1	2	1	1	1	1	1	1	1	1	2	2	2	0	0	0	0	0	0	0	1	1
1250	28	2	1	2	2	2	1	2	2	2	2	1	1	1	0	1	0	1	1	1	0	0	1
1251	20	1	2	1	1	2	2	1	2	1	2	1	1	1	0	0	0	0	0	0	0	0	1
1253	27	2	2	1	2	2	1	2	2	1	2	2	1	1	1	1	1	1	1	1	0	0	1
1254	45	2	1	2	2	2	1	2	2	2	1	2	1	1	0	1	0	1	1	0	0	1	1
1255	37	2	1	2	2	2	1	2	2	2	2	2	2	2	1	0	1	1	0	1	0	1	1
1256	23	1	2	1	2	1	1	1	2	1	2	1	1	1	0	1	1	1	1	0	0	1	1
1257	26	2	2	1	1	2	1	2	2	1	2	2	1	1	0	1	0	1	1	1	0	0	1
1258	24	1	2	2	2	2	1	1	2	2	2	2	2	2	0	0	1	0	0	0	0	1	0
1259	21	1	2	2	2	2	2	2	2	2	2	2	1	1	1	1	0	1	0	1	0	0	1
1260	24	1	2	2	2	2	1	2	2	2	2	2	2	2	0	1	0	1	0	0	0	1	1
1277	23	1	2	1	1	2	1	2	2	1	2	2	1	1	0	1	0	1	0	1	0	0	1
1278	19	1	2	2	1	1	1	1	2	1	2	2	1	1	0	0	0	1	0	0	0	0	1
1279	35	2	1	1	2	2	1	1	1	2	2	2	1	1	0	1	0	1	1	1	0	0	1
1281	32	2	2	1	1	2	1	1	2	2	2	2	2	2	0	0	0	1	0	1	0	0	0
1282	26	2	2	1	2	1	1	1	2	1	2	2	2	2	0	1	1	0	1	0	0	1	1
1283	24	1	2	1	2	2	1	2	2	1	2	2	1	1	0	1	1	0	1	1	0	1	1
1286	22	1	2	1	2	2	2	1	2	1	2	2	1	1	0	1	0	0	1	0	0	0	1
1287	28	2	2	1	2	2	1	1	2	2	2	1	1	1	0	1	0	1	0	1	0	1	1
1288	30	2	2	1	2	1	1	2	2	2	2	2	1	1	0	1	0	1	1	1	0	0	1
1289	27	2	2	1	2	1	1	1	2	1	2	2	1	1	0	1	0	1	1	0	0	0	0
1291	33	2	2	1	1	2	1	1	2	2	2	1	1	1	1	0	1	1	0	0	0	0	1
1292	41	2	1	2	2	2	1	1	1	2	2	2	1	1	0	1	0	1	1	1	0	1	1
1293	24	1	2	1	2	2	1	1	2	1	2	2	1	1	0	0	1	1	0	0	0	1	0
1296	27	2	2	1	2	2	1	1	1	2	2	2	2	2	0	0	0	0	0	0	0	1	0
1302	23	1	2	1	1	2	1	1	2	1	2	1	1	1	1	1	0	0	1	1	0	0	1
1304	26	2	2	2	2	2	1	2	2	2	2	2	2	2	0	0	0	0	0	1	0	1	1
1305	31	2	2	1	1	2	1	2	2	1	2	2	2	2	0	0	0	0	0	0	0	0	0
